# Supplementary material for: Cu-BTC-confined synthesis of Cu-Cu2O-CuS nanojunctions embedded in a porous carbon matrix for remarkable photothermal CO2conversion
Source: Royal Society of Chemistry journal article supplement (doi:10.1039/d3ta00110e), 2023-01-01
Supplement: d3ta00110e1.pdf [file d3ta00110e1.pdf]

## Supporting Information

### **Cu-BTC-confined synthesis of Cu-Cu<sub>2</sub>O-CuS nanojunctions embedded in a porous carbon matrix for remarkable photothermal CO<sub>2</sub> conversion**

Yajie Chen, Yi Ding, Wei Han, Wei Li, Xinyan Yu, Guohui Tian\*

Key Laboratory of Functional Inorganic Material Chemistry, Ministry of Education of the People's Republic of China, Heilongjiang University, Harbin 150080 P. R. China.

E-mail: [tiangh@hlju.edu.cn](mailto:tiangh@hlju.edu.cn)

## **Table of Contents**

Experimental Section/Methods

Supplementary Fig.s and table

## **Experimental Section/Methods**

*Sample characterization:* The crystal structure, microstructure, and morphology of the samples were analyzed by an X-ray diffractometer (XRD, Rigaku, SmartLab 9 KW), transmission electron microscopy (TEM, JEOL, JEM-F200) and scanning electron microscopy (SEM, ZEISS, SIGMA 500). X-ray photoelectron spectroscopy (XPS) tests were finished on Kratos-AXISULTRA DLD, and Al K $\alpha$  is the X-ray source. UV-vis diffuse reflectance spectra (DSR) were obtained from an UV-Vis spectrophotometer (Lambda 750, Perkin Elmer). The photoluminescence (PL) spectra were recorded from a fluorescence spectrophotometer (F-7000, Hitachi). N<sub>2</sub> adsorption-desorption and CO<sub>2</sub> adsorption isotherms were acquired on a Micrometric analyzer (ASAP 2040, Micromeritics) at 77 and 273.15 K, respectively. In situ diffuse reflectance Fourier transform spectra (DRIFTS) were achieved from Nicolet IS-50 infrared spectrometer. CO<sub>2</sub> temperature-programmed desorption (CO<sub>2</sub>-TPD) tests were finished on a ChemBET Pulsar Quantachrome.

*Photoelectrochemical measurements:* The photoelectrochemical tests were finished on a CHI760e electrochemical system with a working electrode, a Pt wire as the counter electrode, and an Ag/AgCl electrode as the reference electrode. Electrolyte is 0.5 M Na<sub>2</sub>SO<sub>4</sub>. The Xe lamp (300 W) with a filter was applied, and the light illumination range is Vis-NIR light ( $400 \text{ nm} \leq \lambda \leq 1100 \text{ nm}$ ). The Mott-Schottky curves were acquired with various frequencies (0.5, 1, and 1.5 kHz) under dark conditions. The electrochemical impedance spectra (EIS) were measured over 0.1-10<sup>5</sup> Hz at an amplitude of 5 mV.

### **The details of oxygen detection**

The air residuals (N<sub>2</sub>+O<sub>2</sub>) was tested before light irradiation in each experiment. The O<sub>2</sub> generation was obtained by subtracting the air residuals. The theoretical of O<sub>2</sub> formation was calculated by (O<sub>2</sub> formation rate) = [(CO formation rate)/2+(CH<sub>4</sub> formation rate)×2].

### Calculation of Apparent Quantum Yield ( $QE$ %):

The apparent quantum yield ( $QE$ ) is defined as the ratio of number of reacted electrons to the number of incident photons. In general, two electrons are required to produce one CO molecule, whereas, eight electrons are needed to produce one CH<sub>4</sub> molecule. The apparent quantum yield ( $QE$ ) measurement was performed using the equation below:

$$QE (\%) = \frac{2 \times N_a \times N_{(CO)} + 8 \times N_a \times N_{(CH_4)}}{I \times A \times \frac{\lambda}{hc} \times t} \times 100\%$$

where,  $N_{(CO)}$  is number of CO (mole) evolved and  $N_{(CH_4)}$  is number of CH<sub>4</sub> (mole) evolved in time “ $t$ ” (1 h),  $N_a$  is Avogadro’s number ( $N = 6.022 \times 10^{23} \text{ mol}^{-1}$ ),  $I$  is the incident solar irradiance ( $I = 1.5 \text{ mW cm}^{-2}$ ), LED (5 W, Beijing Perfectlight Technology Co. Ltd., China) was positioned 4.0 cm above the reactor, and the focused areas in the reactor for LED was  $4 \text{ cm}^2$ .  $\lambda$  is the wavelength of the present study (420 and 550 nm),  $h$  is Planck's constant ( $6.62 \times 10^{-34} \text{ J}\cdot\text{s}$ ),  $c$  is the speed of light ( $3.0 \times 10^8 \text{ m s}^{-1}$ ).

## Supplementary Fig.s and Tables

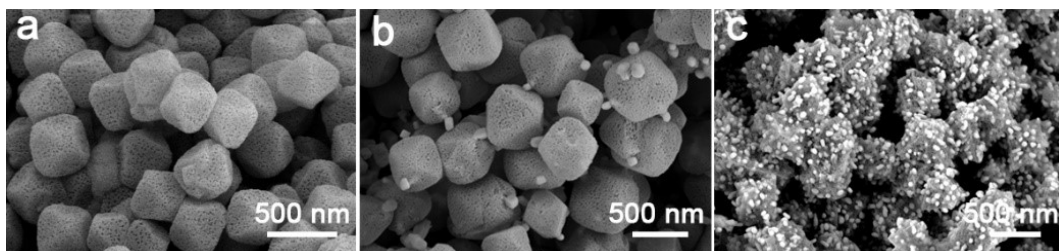

**Fig. S1.** SEM images of Cu-Cu<sub>2</sub>O@C obtained different thermal oxidation time. (a) 10 min, (b) 45 min, and 60 min.

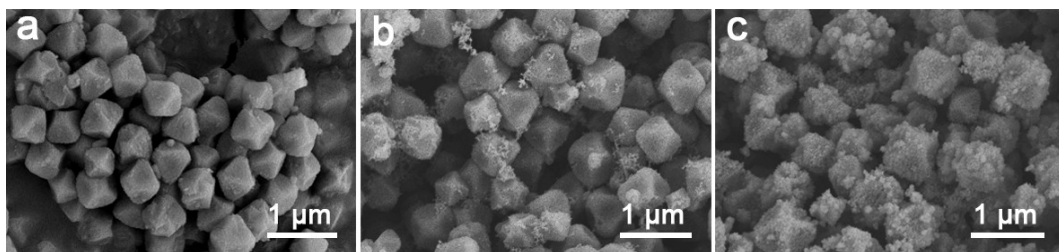

**Fig. S2.** SEM images images of Cu-Cu<sub>2</sub>O-CuS@C samples prepared from different sulfidation time. (a) 10 min, (b) 45 min, and 60 min.

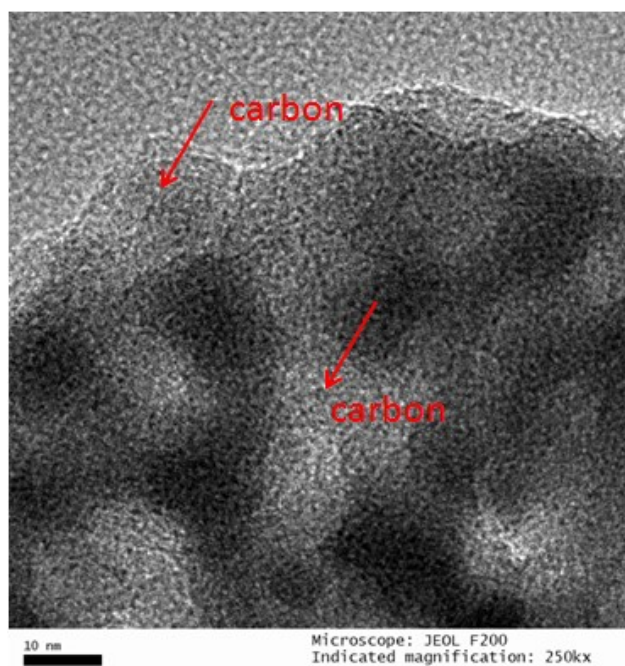

**Fig. S3.** High magnification TEM image of Cu@C.

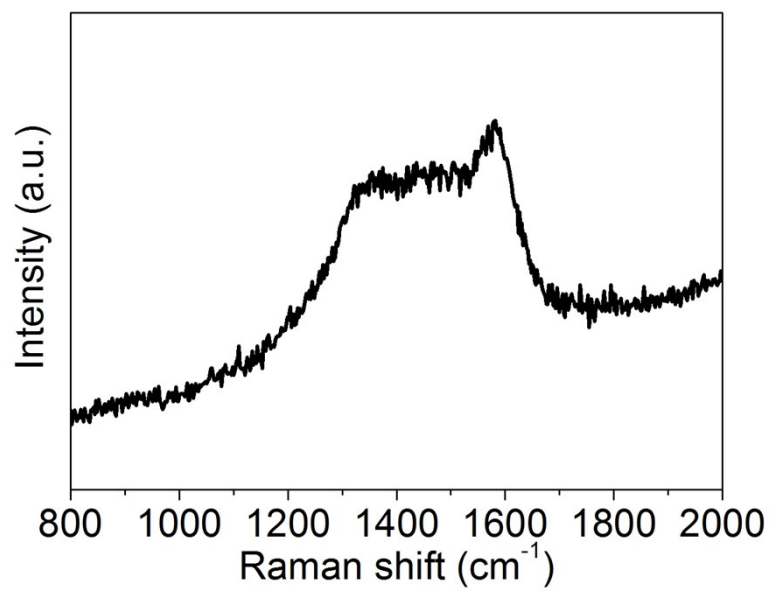

**Fig. S4.** Raman spectrum of Cu@C.

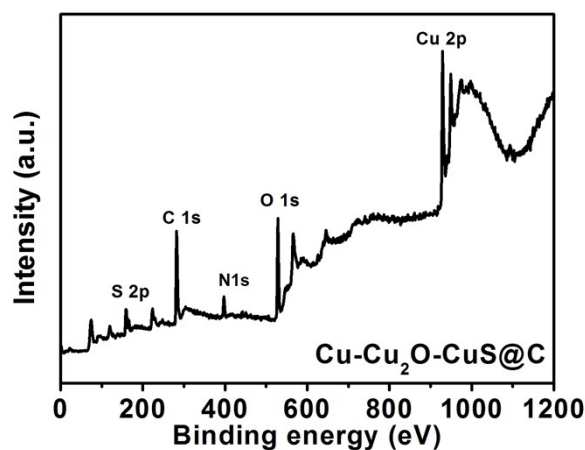

Fig. S5. Survey XPS spectrum of Cu-Cu<sub>2</sub>O-CuS@C.

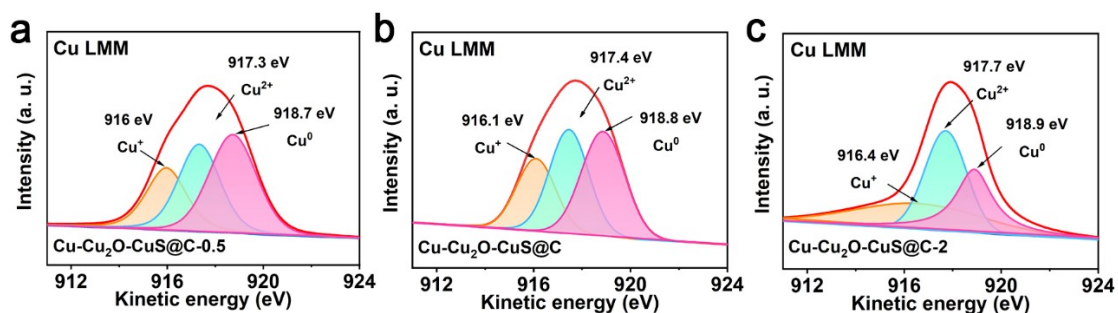

Fig. S6. Auger spectra of Cu-Cu<sub>2</sub>O-CuS@C-0.5 (a), Cu-Cu<sub>2</sub>O-CuS@C (b), and Cu-Cu<sub>2</sub>O-CuS@C-2 (c).

Table S1. Summary of the Cu LMM peak-fitting results

| Sample                                             | Cu-Cu <sub>2</sub> O-CuS@C-0.5 |      | Cu-Cu <sub>2</sub> O-CuS@C |      | Cu-Cu <sub>2</sub> O-CuS@C-2 |      |
|----------------------------------------------------|--------------------------------|------|----------------------------|------|------------------------------|------|
|                                                    | K.E.(eV)                       | At.% | K.E.(eV)                   | At.% | K.E.(eV)                     | At.% |
| Cu <sup>0</sup>                                    | 918.7                          | 42.3 | 918.8                      | 39.6 | 918.9                        | 30.7 |
| Cu <sup>+</sup>                                    | 916.0                          | 23.8 | 916.1                      | 23.5 | 916.4                        | 23.1 |
| Cu <sup>2+</sup>                                   | 917.3                          | 33.9 | 917.4                      | 36.9 | 917.7                        | 46.2 |
| Cu <sup>0</sup> :Cu <sup>+</sup> :Cu <sup>2+</sup> | 10:5:8                         |      | 8:4:7                      |      | 7:2:13                       |      |

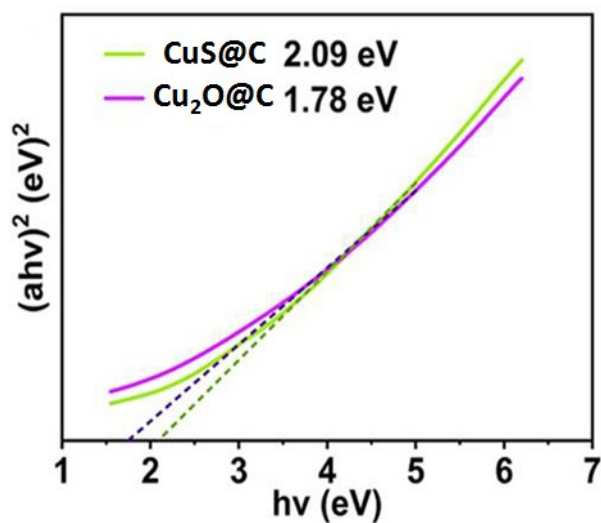

**Fig. S7.** The Tauc plots of the samples derived from the UV-Vis diffuse reflectance spectra in Fig. 6d.

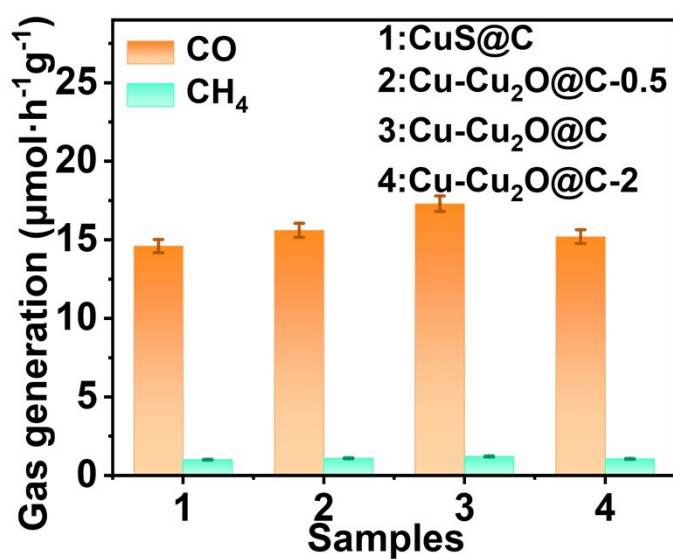

**Fig. S8.** Time-yield plots of CO (a) and CH<sub>4</sub> (b) generated from photocatalytic CO<sub>2</sub> reduction over Cu-Cu<sub>2</sub>O@C samples (Cu-Cu<sub>2</sub>O@C-0.5, Cu-Cu<sub>2</sub>O@C, Cu-Cu<sub>2</sub>O@C-2, and Cu<sub>2</sub>O@C) with different Cu/Cu<sub>2</sub>O ratios under Vis-NIR light irradiation. (based on 3 separate measurements, error estimates: 3.03 %).



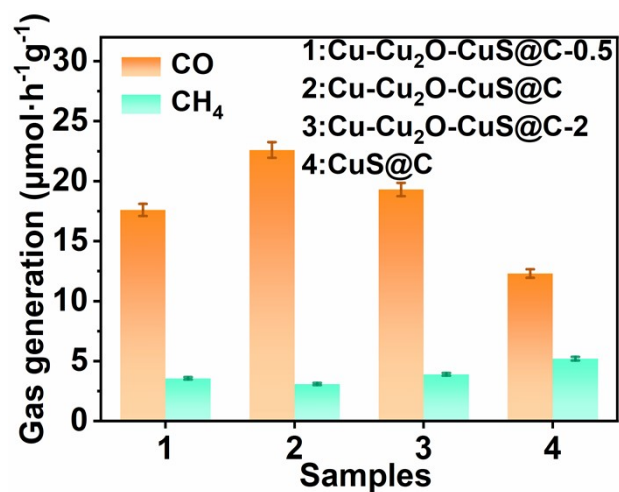

**Fig. S9.** Average yields of CO (a) and CH<sub>4</sub> (b) generated from photocatalytic CO<sub>2</sub> reduction over the Cu-Cu<sub>2</sub>O-CuS@C samples with different sulfidation degree. (based on 3 separate measurements, error estimates: 3.01 %).

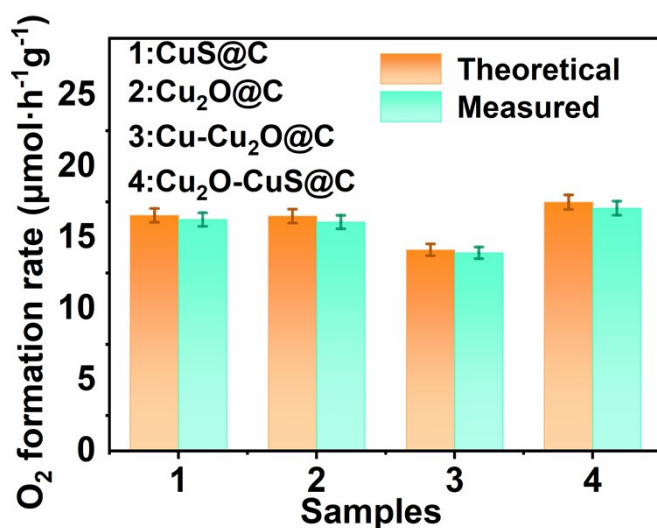

**Fig. S10.** The O<sub>2</sub> formation rate of different photocatalysts. (based on 3 separate measurements, error estimates: 3.08 %).

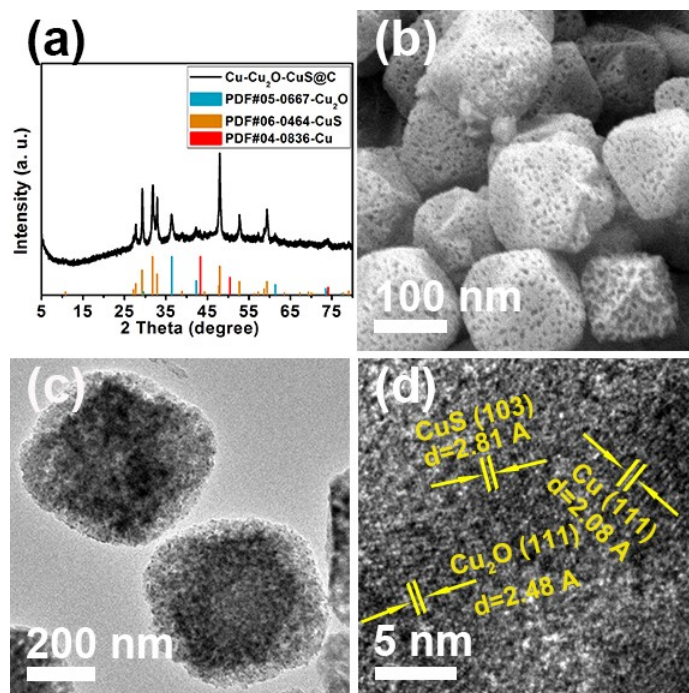

**Fig. S11.** (a) XRD pattern, (b) SEM, (c) TEM, and (d) HRTEM images of Cu-Cu<sub>2</sub>O-CuS@C after CO<sub>2</sub> reduction reaction tests.

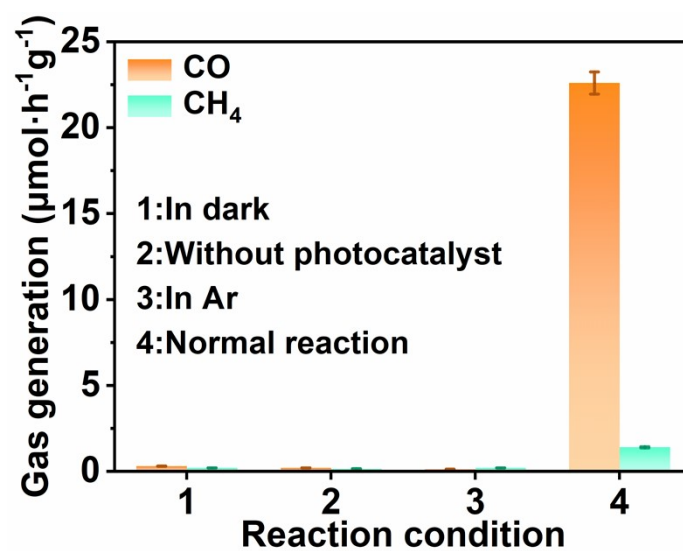

**Fig. S12.** Average production rates of CO and CH<sub>4</sub> over Cu-Cu<sub>2</sub>O-CuS@C samples under different photocatalytic conditions. (based on 3 separate measurements, error estimates: 2.97 %).

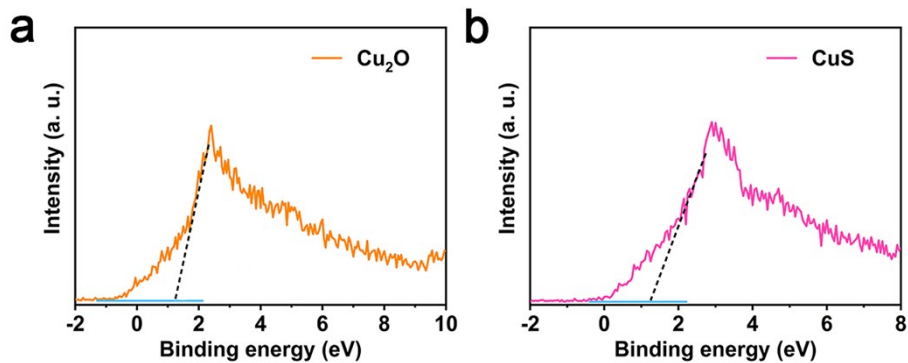

**Fig. S13.** XPS valence band spectra of (a)  $\text{Cu}_2\text{O}$  and (b)  $\text{CuS}$ .

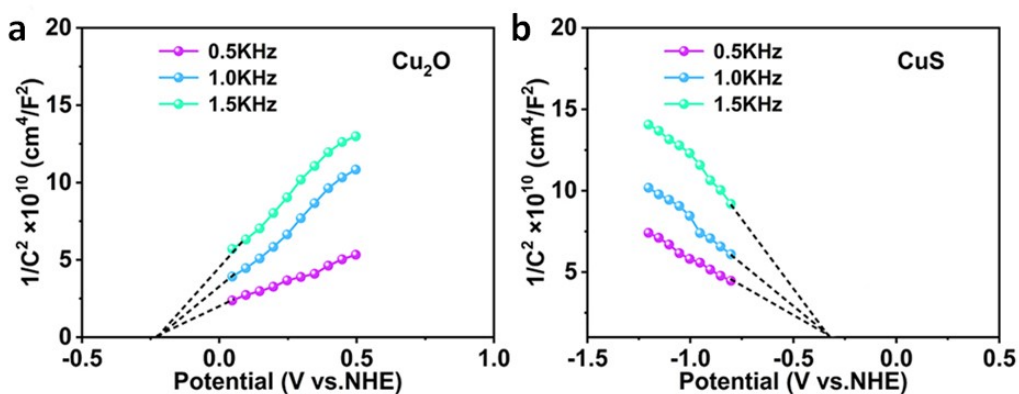

**Fig. S14.** Mott-Schottky plots of (a)  $\text{Cu}_2\text{O}$  and (b)  $\text{CuS}$ .

**Table S2.** The surface area ( $S_{\text{BET}}$ ), pore volume and average pore size of the samples were prepared.

| Samples                                | $S_{\text{BET}}$ ( $\text{m}^2 \text{g}^{-1}$ ) | Pore volume ( $\text{cm}^3 \text{g}^{-1}$ ) | Average pore size (nm) |
|----------------------------------------|-------------------------------------------------|---------------------------------------------|------------------------|
| Cu-BTC                                 | 706.5                                           | 0.31                                        | 0.5                    |
| $\text{Cu}_2\text{O}@C$                | 40.1                                            | 0.11                                        | 12.3                   |
| Cu- $\text{Cu}_2\text{O}@C$            | 60.8                                            | 0.22                                        | 17.1                   |
| Cu- $\text{Cu}_2\text{O}-\text{CuS}@C$ | 83.4                                            | 0.33                                        | 19.4                   |
| $\text{CuS}@C$                         | 43.9                                            | 0.14                                        | 13.1                   |

**Table S3.** The summary of CO and CH<sub>4</sub> productions from the photocatalytic conversion of CO<sub>2</sub> over different samples under Vis-NIR light irradiation. (experiment times: 3, error estimates: 2.95 %).

| Photocatalyst              | CO                                       | CH <sub>4</sub>                          | CO         | <i>QE</i> (%),<br>$\lambda=420$ nm | <i>QE</i> (%),<br>$\lambda=550$ nm |
|----------------------------|------------------------------------------|------------------------------------------|------------|------------------------------------|------------------------------------|
|                            | yield                                    | yield                                    | selectivit |                                    |                                    |
|                            | ( $\mu\text{mol g}^{-1} \text{h}^{-1}$ ) | ( $\mu\text{mol g}^{-1} \text{h}^{-1}$ ) | y (%)      |                                    |                                    |
| CuS@C                      | 12.2±0.3                                 | 5.10±0.1                                 | 37.4±1.0   | 0.706±0.02                         | 0.568±0.01                         |
| Cu <sub>2</sub> O@C        | 14.5±0.4                                 | 4.50±0.1                                 | 44.6±1.2   | 0.958±0.02                         | 0.636±0.01                         |
| Cu-Cu <sub>2</sub> O-CuS@C | 22.5±0.6                                 | 3.08±0.1                                 | 64.6±1.8   | 1.926±0.05                         | 1.586±0.04                         |
| Cu-Cu <sub>2</sub> O@C     | 17.2±0.4                                 | 2.73±0.1                                 | 61.1±1.7   | 1.403±0.04                         | 1.081±0.03                         |

**Table S4.** Summary of the photoluminescence decay time ( $\tau$ ) and their relative intensities of different samples.

| Sample                     | $\tau_1$ (ns) | $\tau_2$ (ns) | $B_1$ | $B_2$ | Average lifetime ( $\tau$ , ns) |
|----------------------------|---------------|---------------|-------|-------|---------------------------------|
| Cu-Cu <sub>2</sub> O@C     | 1.8           | 14.1          | 62.1  | 37.9  | 13.8 ± 0.3                      |
| Cu <sub>2</sub> O@C        | 1.5           | 10.1          | 65.6  | 34.4  | 8.2 ± 0.3                       |
| Cu-Cu <sub>2</sub> O-CuS@C | 2.6           | 17.6          | 51.9  | 48.1  | 15.5 ± 0.4                      |
| CuS@C                      | 1.1           | 8.9           | 68.3  | 31.7  | 7.1 ± 0.2                       |

The average lifetime was calculated using the equation:  $(\tau)=(B_1\tau_1^2+ B_2\tau_2^2)/(B_1\tau_1+ B_2\tau_2)$ . (experiment times: 3, error estimates: 2.92%).

**Table S5.** Fitting results for Nyquist plots of the different samples.

| Sample                     | $R_s(\Omega)$ | $R_{ct}(\Omega)$ | $C_{ct}(\mu F)$ |
|----------------------------|---------------|------------------|-----------------|
| CuS@C                      | 11.56         | 23.34            | 0.329           |
| Cu <sub>2</sub> O@C        | 9.42          | 19.19            | 0.422           |
| Cu-Cu <sub>2</sub> O@C     | 8.90          | 17.63            | 0.432           |
| Cu-Cu <sub>2</sub> O-CuS@C | 7.12          | 15.12            | 0.478           |

**Table S6.** The energy band parameters of the samples.

| Sample            | $E_g$ (eV) | $E_f$ (eV) | XPS VB<br>(eV) | $E_{VBT}$ (eV) | $E_{CBB}$ (eV) |
|-------------------|------------|------------|----------------|----------------|----------------|
| CuS               | 2.09       | -0.35      | 1.18           | 0.73           | -1.36          |
| Cu <sub>2</sub> O | 1.78       | -0.24      | 1.17           | 0.93           | -0.86          |
